# Supplementary material for: Inflammatory Blood Signature Related to Common Psychological Comorbidity in Chronic Pain
Source: MDPI journal article supplement (doi:10.3390/biomedicines11030713), 2023-02-27
Supplement: s1 [file s1]

## Supplementary figures

The following score plots are based on the principal component analysis (PCA, Figure 2) including all proteins as x-variables. To get an overview of the clinical picture of each identified subgroups identified by the hierarchical cluster analysis (HCA), the score plots (showing the included observations or individual chronic pain patients) were sized and colored according to different clinical features. Each plot shows the first two principal components ( $t[1]$  and  $t[2]$ ). The size of the geometrical shape represents higher self-reported score in the clinical variable of choice. The identified groups according to HCA were subgroup 1 = Squares, Subgroup 2 = circles, and subgroup 3 = triangles. Each individual score plot shows the distribution among the study population of sex (Figure S1), pain intensity (Figure S2), age (Figure S3), BMI (Figure S4), anxiety (GAD-9, Figure S5), and depression (PHQ-9, Figure S6).

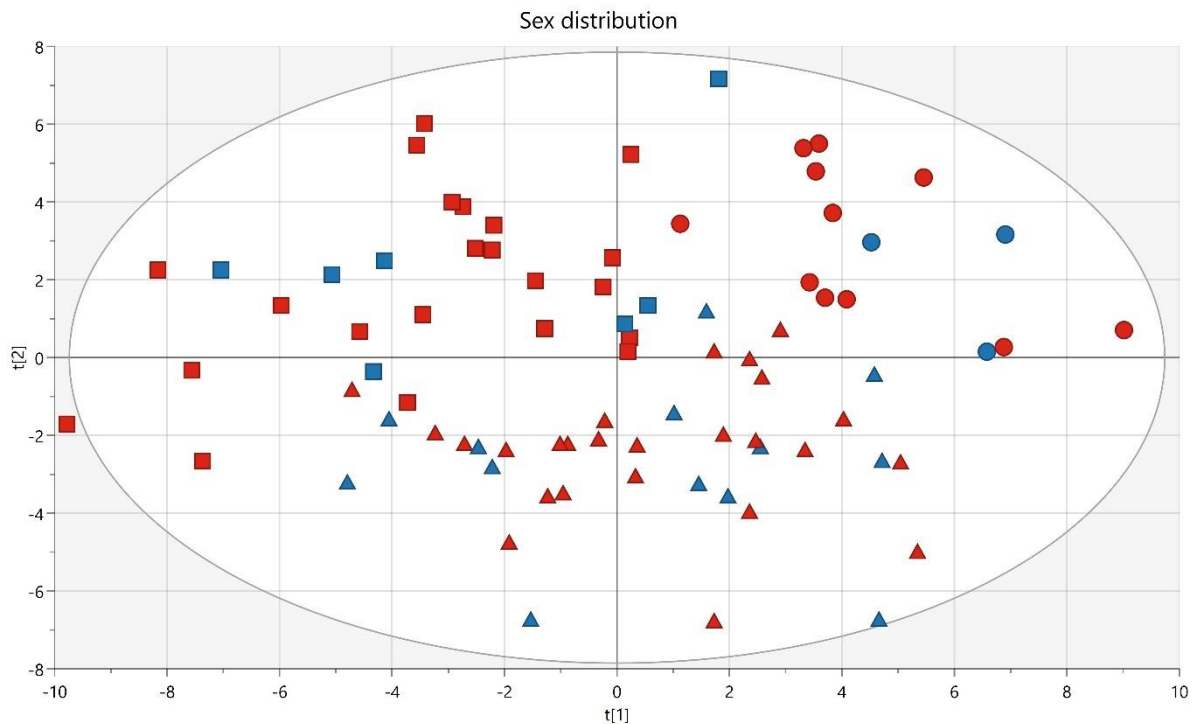

**Figure S1. Score plot showing sex distribution among observations.** Red = Women, blue = Men. Squares = group 1, circles = group 2, triangles = group 3.

## Inflammatory blood signature related to common psychological comorbidity in chronic pain

Bianka Karshikoff, Karin Wåhlén, Jenny Åström, Mats Lekander, Linda Holmström and Rikard K. Wicksell

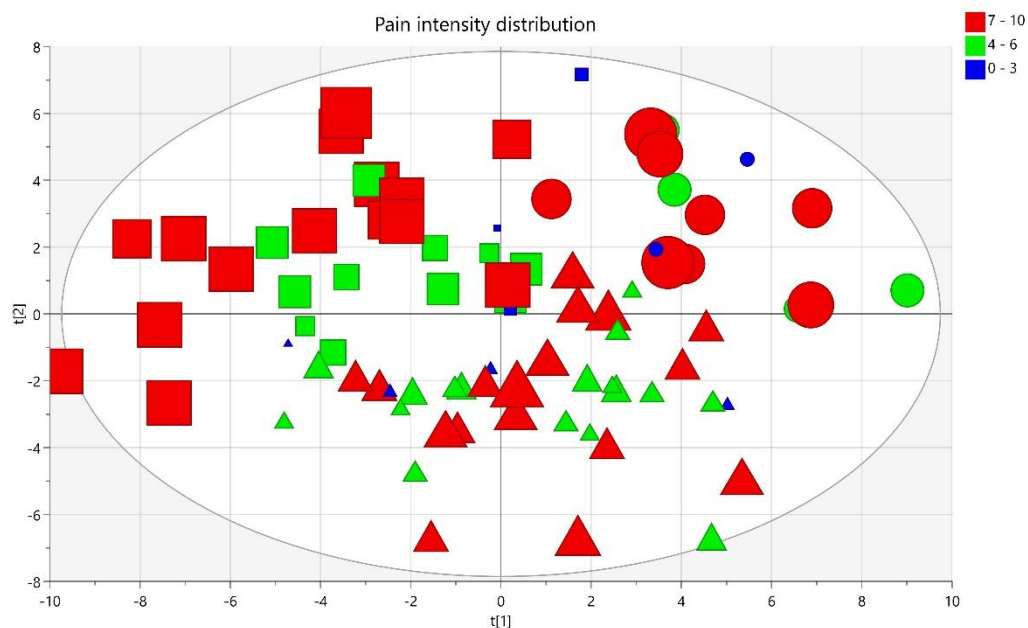

**Figure S2. Pain intensity distribution among the three subgroups.** The score plot show each observation and is colored according to self-reported pain intensity ranging from 0-10, where 0 = no pain, and 10 = worst imaginable pain. Blue = mild pain intensity (0-3), green = moderate pain intensity (4-6), and red = severe pain intensity (7-10). Each observation is also sized according to self-reported pain intensity, the larger size, the larger self-reported pain. Squares = group 1, circles = group 2, triangles = group 3.

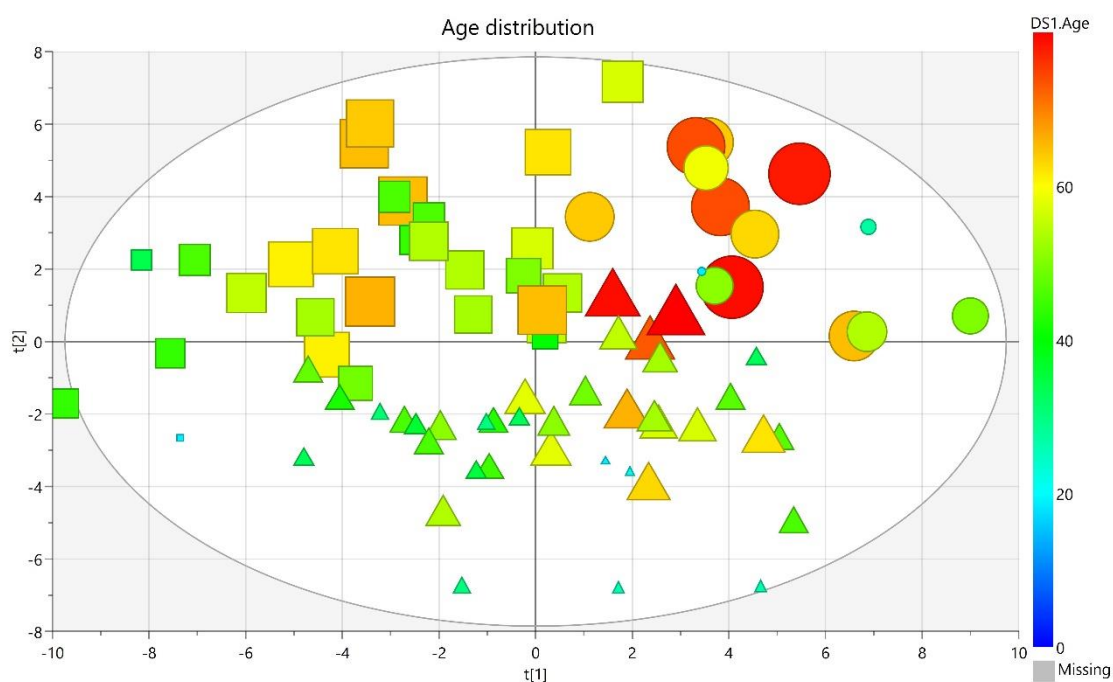

**Figure S3. Score plot displaying the age distribution among each subgroup.** The color bar to the right in the figure shows the age span (19-80 years). Each observation (squares = Group 1, circles = Group 2, or triangles = group 3) is sized according to age, the larger the size the higher the age.

## Inflammatory blood signature related to common psychological comorbidity in chronic pain

Bianka Karshikoff, Karin Wåhlén, Jenny Åström, Mats Lekander, Linda Holmström and Rikard K. Wicksell

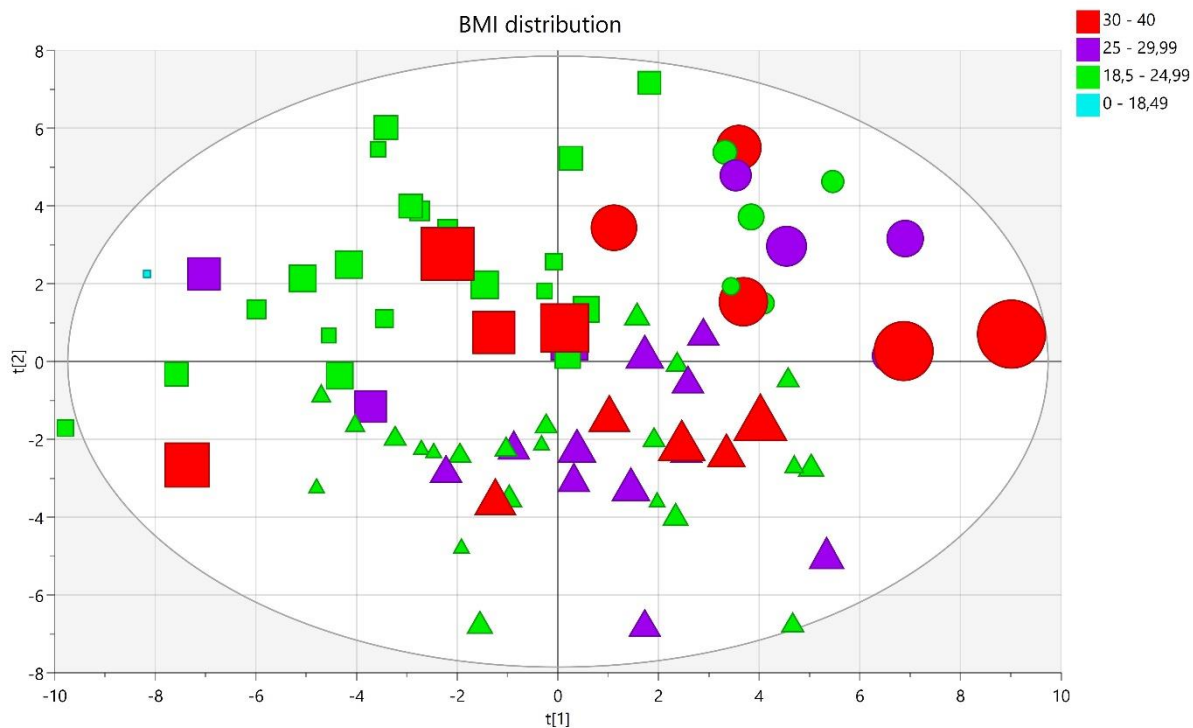

**Figure S4. BMI distribution among the three subgroups.** Each observation in the score plot is colored according to WHO standards of BMI: underweight <18.5, normal weight 18.5-24.99, overweight 25.0-29.99, obese >30. Each observation is sized according to BMI, the larger the size the higher BMI. Squares = group 1, circles = group 2, triangles = group 3.

## Inflammatory blood signature related to common psychological comorbidity in chronic pain

Bianka Karshikoff, Karin Wåhlén, Jenny Åström, Mats Lekander, Linda Holmström and Rikard K. Wicksell

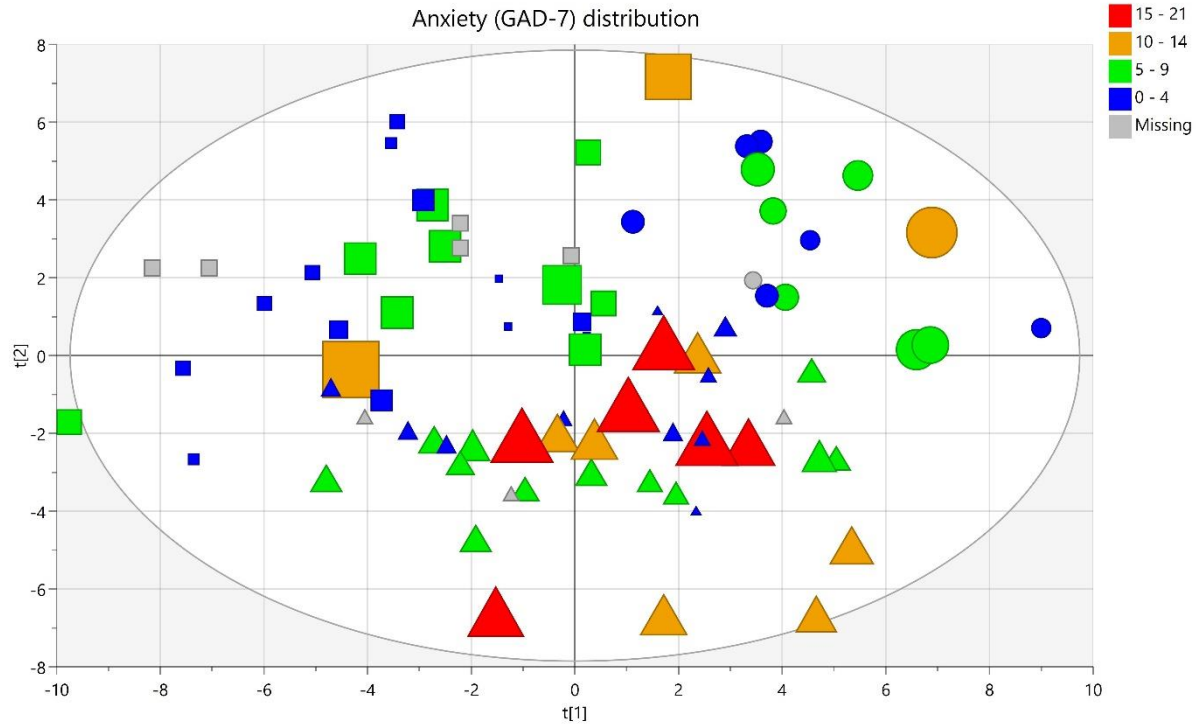

**Figure S5. Distribution of anxiety based on self-reported GAD-7 questionnaire.** The larger the geometrical shape the larger self-reported GAD-7 score. The cut-off scores for anxiety are: none 0-4 (blue), mild 5-9 (green), moderate 10-14 (yellow), severe 15-21 (red). Grey color indicates missing data in questionnaire. Squares = group 1, circles = group 2, triangles = group 3.

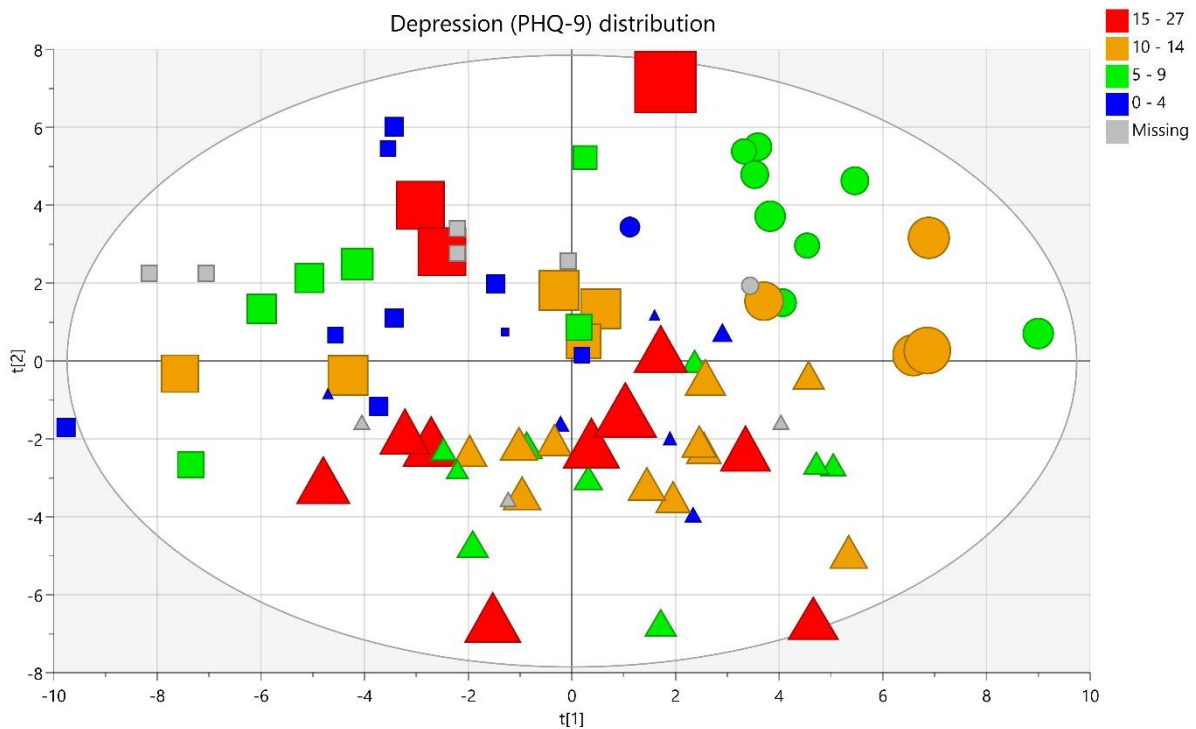

**Figure S6. Distribution of depression based on self-reported PHQ-9 questionnaire.** The larger the geometrical shape the larger self-reported PHQ-9 score. The cut-off scores for depression are: none 0-4 (blue), mild 5-9 (green), moderate 10-15 (yellow), moderate/severe 15-27 (red). Grey color indicates missing data in questionnaire. Squares = group 1, circles = group 2, triangles = group 3.

## Inflammatory blood signature related to common psychological comorbidity in chronic pain

Bianka Karshikoff, Karin Wåhlén, Jenny Åström, Mats Lekander, Linda Holmström and Rikard K. Wicksell

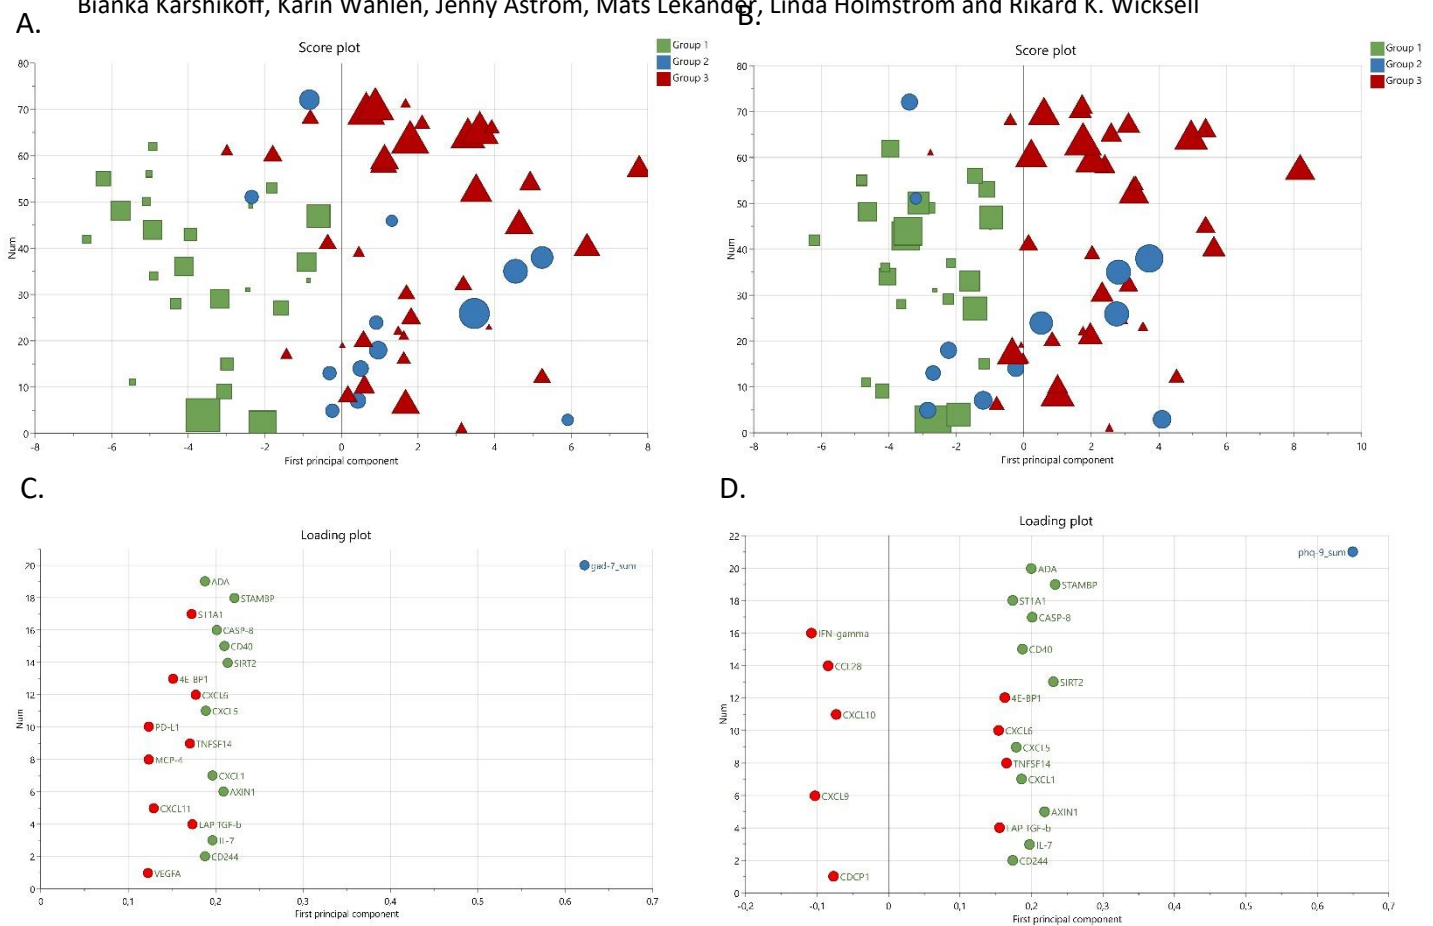

**Figure S7. OPLS regression of anxiety (GAD-9) and depression (PHQ-9).** In the score plots showing each observation for **A)** Anxiety (GAD-9) and **B)** Depression (PHQ-9), the geometrical shapes represent the three different subgroups identified by HCA in the PCA of protein. In the lower loading plots, **C)** Anxiety (GAD-7) and, **D)** Depression (PHQ-9), the green dots represent significant proteins with a VIP value > 1.0. Red dots = non-significant proteins (VIP < 1.0). The larger the size of the geometrical shapes, the higher self-reported PHQ-9 or GAD-9 scores. All significant proteins were associated with higher PHQ-9 and GAD-7 scores.

## Supplementary Tables

**Table S1. Proteins intercorrelated to detected subgroups in PCA.**

| Protein name                | Uniprot Protein Accession number | Loadings p[1] | Loadings p[2] |
|-----------------------------|----------------------------------|---------------|---------------|
| <b>Subgrupp 1 (squares)</b> |                                  |               |               |
| uPA                         | P00749                           | 0.007701      | 0.115283      |
| CST5                        | P28325                           | 0.014504      | 0.080477      |
| SCF                         | P21583                           | -0.02967      | -0.01695      |
| LIF-R                       | P42702                           | -0.00129      | 0.137405      |
| TNF                         | P01375                           | 0.021701      | 0.010077      |
| DNER                        | Q8NFT8                           | -0.05688      | 0.063711      |
| NT-3                        | P20783                           | -0.01012      | -0.00926      |
| TWEAK                       | O43508                           | -0.03638      | -0.00723      |
| TNFB                        | P01374                           | 0.008115      | 0.076902      |
| Cortisol                    | -                                | -0.00779      | 0.033713      |
| <b>Subgrupp 2 (circles)</b> |                                  |               |               |
| IL-8                        | P10145                           | 0.073215      | 0.087761      |
| VEGFA                       | P15692                           | 0.18589       | 0.015591      |
| MCP-3                       | P80098                           | 0.159124      | 0.028274      |
| GDNF                        | P39905                           | 0.10588       | 0.088696      |
| CDCP1                       | Q9H5V8                           | 0.092089      | 0.181317      |
| OPG                         | O00300                           | 0.101336      | 0.135738      |
| IL-6                        | P05231                           | 0.129856      | 0.06312       |
| MCP-1                       | P13500                           | 0.122117      | 0.168021      |
| IL-17A                      | Q16552                           | 0.06591       | 0.035902      |
| TRAIL                       | P50591                           | 0.092675      | 0.074463      |
| CXCL9                       | Q07325                           | 0.075454      | 0.212705      |
| CCL4                        | P13236                           | 0.124929      | 0.068135      |
| CD6                         | P30203                           | 0.014065      | 0.138969      |
| IL-18                       | Q14116                           | 0.095744      | 0.030416      |
| SLAMF1                      | Q13291                           | 0.08616       | 0.046251      |
| TGF-alpha                   | P01135                           | 0.131406      | 0.105285      |
| CCL11                       | P51671                           | 0.093557      | 0.175338      |
| FGF-23                      | Q9GZV9                           | 0.060616      | 0.052098      |
| FGF-21                      | Q9NSA1                           | 0.102735      | 0.075645      |
| CCL19                       | Q99731                           | 0.089788      | 0.134327      |
| IL-15RA                     | Q13261                           | 0.110022      | 0.160302      |
| IL-10RB                     | Q08334                           | 0.135783      | 0.112928      |
| IL-18R1                     | Q13478                           | 0.117285      | 0.048255      |
| PD-L1                       | Q9NZQ7                           | 0.162742      | 0.042569      |
| TRANCE                      | O14788                           | 0.076545      | 0.039912      |
| HGF                         | P14210                           | 0.183636      | 0.047935      |

# Inflammatory blood signature related to common psychological comorbidity in chronic pain

Bianka Karshikoff, Karin Wåhlén, Jenny Åström, Mats Lekander, Linda Holmström and Rikard K. Wicksell

|                               |        |          |          |
|-------------------------------|--------|----------|----------|
| <b>IL-12B</b>                 | P29460 | 0.076319 | 0.143504 |
| <b>MMP-10</b>                 | P09238 | 0.031954 | 0.106529 |
| <b>IL-10</b>                  | P22301 | 0.110218 | 0.058349 |
| <b>CCL23</b>                  | P55773 | 0.030913 | 0.073926 |
| <b>CD5</b>                    | P06127 | 0.039843 | 0.177607 |
| <b>CCL3</b>                   | P10147 | 0.164579 | 0.10203  |
| <b>Flt3L</b>                  | P49771 | 0.046692 | 0.154488 |
| <b>CXCL10</b>                 | P02778 | 0.123533 | 0.174504 |
| <b>CCL28</b>                  | Q9NRJ3 | 0.023178 | 0.139282 |
| <b>EN-RAGE</b>                | P80511 | 0.054851 | 0.063496 |
| <b>IFN-gamma</b>              | P01579 | 0.032722 | 0.133942 |
| <b>FGF-19</b>                 | O95750 | 0.040216 | 0.103356 |
| <b>CCL25</b>                  | O15444 | 0.066201 | 0.121163 |
| <b>CX3CL1</b>                 | P78423 | 0.021749 | 0.143576 |
| <b>TNFRSF9</b>                | Q07011 | 0.110524 | 0.169327 |
| <b>CCL20</b>                  | P78556 | 0.074937 | 0.079061 |
| <b>CSF-1</b>                  | P09603 | 0.121774 | 0.152681 |
| <b>hs_crp</b>                 | P02741 | 0.104404 | 0.027856 |
| <b>Subgroup 3 (triangles)</b> |        |          |          |
| <b>CD8A</b>                   | P01732 | 0.044268 | 0.014638 |
| <b>CD244</b>                  | Q9BZW8 | 0.165331 | -0.11223 |
| <b>IL-7</b>                   | P13232 | 0.174802 | -0.17432 |
| <b>LAP TGF-beta-1</b>         | P01137 | 0.1910   | -0.05751 |
| <b>CXCL11</b>                 | O14625 | 0.171861 | -0.04536 |
| <b>AXIN1</b>                  | O15169 | 0.163262 | -0.21499 |
| <b>OSM</b>                    | P13725 | 0.126696 | -0.03647 |
| <b>CXCL1</b>                  | P09341 | 0.175852 | -0.1556  |
| <b>MCP-4</b>                  | Q99616 | 0.171629 | -0.01139 |
| <b>TNFSF14</b>                | O43557 | 0.187033 | -0.08975 |
| <b>IL-10RA</b>                | Q13651 | 0.061916 | 0.006705 |
| <b>MMP-1</b>                  | P03956 | 0.084347 | 0.000789 |
| <b>CXCL5</b>                  | P42830 | 0.170783 | -0.16153 |
| <b>CXCL6</b>                  | P80162 | 0.183431 | -0.08609 |
| <b>4E-BP1</b>                 | Q13541 | 0.12427  | -0.12448 |
| <b>SIRT2</b>                  | Q8IXJ6 | 0.157645 | -0.22338 |
| <b>CD40</b>                   | P25942 | 0.205989 | -0.12672 |
| <b>MCP-2</b>                  | P80075 | 0.109099 | -0.02847 |
| <b>CASP-8</b>                 | Q14790 | 0.179056 | -0.14337 |
| <b>ST1A1</b>                  | P50225 | 0.119242 | -0.1716  |
| <b>STAMBP</b>                 | O95630 | 0.168374 | -0.22128 |
| <b>ADA</b>                    | P00813 | 0.144885 | -0.17022 |
| <b>sr_ESR</b>                 | -      | 0.090901 | 0.002094 |

# Inflammatory blood signature related to common psychological comorbidity in chronic pain

Bianka Karshikoff, Karin Wåhlén, Jenny Åström, Mats Lekander, Linda Holmström and Rikard K. Wicksell

**Table S2. Background and clinical data subgroups**

| Variable                     | Subgroup 1<br>(n=29)       | Subgroup 2<br>(n=14)     | Subgroup 3<br>(n=38)        | Kruskal-Wallis test |               | Subgroup<br>1 vs 2 | Subgroup<br>1 vs 3 | Subgroup<br>2 vs 3 |
|------------------------------|----------------------------|--------------------------|-----------------------------|---------------------|---------------|--------------------|--------------------|--------------------|
|                              | Mean (SD)                  |                          |                             | H                   | P-value       | Adj. P-value       |                    |                    |
| Background data              |                            |                          |                             |                     |               |                    |                    |                    |
| Age                          | 52.59 (10.61)              | 58.64 (17.77)            | 46.89 (15.04)               | 8.632               | <b>0.0134</b> | 0.4507             | 0.2703             | <b>0.0138</b>      |
| BMI                          | 24.19 (4.03)               | 27.89 (5.70)             | 25.22 (4.07)                | 4.27                | 0.1184        | 0.1167             | 1.00               | 0.4642             |
| Sex, Females/<br>Males % (n) | 75.7 % (22) /<br>24.1% (7) | 78.6% (11)/<br>21.4% (3) | 65.8 % (25)/<br>34.2 % (13) | -                   | -             | -                  | -                  | -                  |
| Pain characteristics         |                            |                          |                             |                     |               |                    |                    |                    |
| Pain area number             | 4.65 (2.97)                | 4.01 (2.97)              | 4.92 (3.04)                 | 0.4814              | 0.7861        | 1.00               | 1.00               | 1.00               |
| Pain intensity               | 6.38 (1.86)                | 6.50 (1.871)             | 6.026 (1.91)                | 1.243               | 0.5373        | 1.00               | 1.00               | 1.00               |
| Pain duration (years)        | 10.43 (6.29)               | 15.73 (16.02)            | 10.41 (6.53)                | 0.424               | 0.8090        | 1.00               | 1.00               | 1.00               |
| Psychological comorbidity    |                            |                          |                             |                     |               |                    |                    |                    |
| Depression (PHQ-9)           | 7.667 (4.896)              | 8.385 (2.931)            | 10.86 (5.996)               | 4.532               | 0.1037        | 1.00               | 0.1114             | 0.8132             |
| Anxiety (GAD-7)              | 4.50 (3.612)               | 5.692 (2.658)            | 7.857 (5.151)               | 6.907               | <b>0.0316</b> | 0.8307             | <b>0.0260</b>      | 0.9677             |
| Other clinical parameters    |                            |                          |                             |                     |               |                    |                    |                    |
| General health (SRH-5)       | 2. 86 (0.915)              | 2.93 (0.99)              | 2.95 (1.06)                 | 0.1256              | 0.9392        | 1.00               | 1.00               | 1.00               |
| Insomnia (ISI)               | 13.56 (6.68)               | 13.57 (6.63)             | 13.11 (6.71)                | 0.0146              | 0.9927        | 1.00               | 1.00               | 1.00               |
| Stress (PSS)                 | 22.0 (9.63)                | 15.0 (5.88)              | 20.44 (9.32)                | 4.425               | 0.1092        | 0.1278             | 1.0                | 0.2106             |
| Physical wellbeing (PCS-12)  | 32.5 (6.97)                | 32.97 (12.2)             | 33.23 (8.19)                | 0.0147              | 0.9927        | 1.00               | 1.00               | 1.00               |
| Mental wellbeing (MCS-12)    | 37.2 (13.35)               | 49.28 (11.17)            | 38.32 (12.83)               | 6.634               | <b>0.0363</b> | 0.0570             | 1.00               | <b>0.0502</b>      |



# Inflammatory blood signature related to common psychological comorbidity in chronic pain

Bianka Karshikoff, Karin Wåhlén, Jenny Åström, Mats Lekander, Linda Holmström and Rikard K. Wicksell

**Table S3.** Subgroup comparison of significant proteins from OPLS models of depression and anxiety.

| Protein name     | Uniprot Protein Accession number | Subgroup 1 (n=29) | Subgroup 2 (n=14) | Subgroup 3 (n=38) | Kruskal-Wallis test |                   | Subgroup 1 vs 2   | Subgroup 1 vs 3   | Subgroup 2 vs 3 |
|------------------|----------------------------------|-------------------|-------------------|-------------------|---------------------|-------------------|-------------------|-------------------|-----------------|
|                  |                                  | NPX Mean (SD)     |                   |                   | H                   | P-value           | Adj. P-value      |                   |                 |
| <b>CD244</b>     | Q9BZW8                           | 6.430<br>(0.299)  | 6.790<br>(0.377)  | 6.860<br>(0.284)  | 25.90               | <b>&lt;0.0001</b> | <b>0.0055</b>     | <b>&lt;0.0001</b> | 1.00            |
| <b>IL-7</b>      | P13232                           | 2.214<br>(0.395)  | 3.056<br>(0.490)  | 3.209<br>(0.531)  | 44.40               | <b>&lt;0.0001</b> | <b>&lt;0.0001</b> | <b>&lt;0.0001</b> | 1.00            |
| <b>AXIN1</b>     | O15169                           | 4.338<br>(0.799)  | 5.536<br>(0.612)  | 6.179<br>(0.698)  | 49.66               | <b>&lt;0.0001</b> | <b>0.0049</b>     | <b>&lt;0.0001</b> | 0.0685          |
| <b>CXCL1</b>     | P09341                           | 8.012<br>(0.728)  | 9.150<br>(0.500)  | 9.244<br>(0.612)  | 35.76               | <b>&lt;0.0001</b> | <b>0.0003</b>     | <b>&lt;0.0001</b> | 1.00            |
| <b>CXCL5</b>     | P42830                           | 9.648<br>(1.179)  | 11.32<br>(0.647)  | 11.65<br>(0.771)  | 37.84               | <b>&lt;0.0001</b> | <b>0.0009</b>     | <b>&lt;0.0001</b> | 0.9405          |
| <b>SIRT2</b>     | Q8IXJ6                           | 4.707<br>(0.746)  | 5.948<br>(0.808)  | 6.694<br>(0.627)  | 51.55               | <b>&lt;0.0001</b> | <b>0.0079</b>     | <b>&lt;0.0001</b> | <b>0.0339</b>   |
| <b>CD40</b>      | P25942                           | 10.91<br>(0.314)  | 11.60<br>(0.299)  | 11.57<br>(0.317)  | 40.95               | <b>&lt;0.0001</b> | <b>&lt;0.0001</b> | <b>&lt;0.0001</b> | 1.00            |
| <b>Caspase-8</b> | Q14790                           | 1.026<br>(0.252)  | 1.566<br>(0.493)  | 1.606<br>(0.326)  | 39.66               | <b>&lt;0.0001</b> | <b>0.0007</b>     | <b>&lt;0.0001</b> | 0.8521          |
| <b>ST1A1</b>     | P50225                           | 2.295<br>(0.709)  | 2.975<br>(0.627)  | 3.381<br>(0.579)  | 31.02               | <b>&lt;0.0001</b> | <b>0.0303</b>     | <b>&lt;0.0001</b> | 0.2606          |
| <b>STAMBP</b>    | O95630                           | 5.385<br>(0.553)  | 6.473<br>(0.772)  | 7.029<br>(0.620)  | 51.74               | <b>&lt;0.0001</b> | <b>0.0019</b>     | <b>&lt;0.0001</b> | 0.1041          |
| <b>ADA</b>       | P00813                           | 4.832<br>(0.262)  | 5.435<br>(0.617)  | 5.490<br>(0.417)  | 39.17               | <b>&lt;0.0001</b> | 0.0004            | <b>&lt;0.0001</b> | 1.00            |

Bianka Karshikoff, Karin Wåhlén, Jenny Åström, Mats Lekander, Linda Holmström and Rikard K. Wicksell

**Table S4. Significant proteins for the OPLS models investigating correlation with age.**

Proteins are sorted according to highest VIP-value. Bold marked proteins are proteins that were found significant in the OPLS-DA model comparing patients with moderate/high or low /no psychological comorbidity. # = protein found in the OPLS models of depression (PHQ-9) and anxiety (GAD-7).

| <b>Age</b>             |                                         |                |                |
|------------------------|-----------------------------------------|----------------|----------------|
| <b>Protein name</b>    | <b>Uniprot Protein Accession number</b> | <b>VIPpred</b> | <b>p(corr)</b> |
| <b>CXCL9</b>           | Q07325                                  | 2.88046        | 0.778189       |
| <b>CXCL10</b>          | P02778                                  | 2.63727        | 0.712466       |
| <b>CDCP1</b>           | Q9H5V8                                  | 2.1949         | 0.592938       |
| <b>CCL28</b>           | Q9NRJ3                                  | 2.08892        | 0.564361       |
| <i>OPG</i>             | O00300                                  | 2.0123         | 0.543597       |
| <i>CCL11</i>           | P51671                                  | 1.92525        | 0.520187       |
| <i>Flt3L</i>           | P49771                                  | 1.87183        | 0.505567       |
| <i>CST5</i>            | P28325                                  | 1.64666        | 0.444777       |
| <i>FGF-21</i>          | Q9NSA1                                  | 1.4996         | 0.405091       |
| <i>MCP-4</i>           | Q99616                                  | 1.48922        | 0.402464       |
| <i>MCP-1</i>           | P13500                                  | 1.43749        | 0.388364       |
| <i>IL-12B</i>          | P29460                                  | 1.28246        | 0.346422       |
| <i>CCL3</i>            | P10147                                  | 1.27309        | 0.344007       |
| <i>TNF</i>             | P01375                                  | 1.14689        | -0.30985       |
| <i>MCP-3</i>           | P80098                                  | 1.14239        | 0.308739       |
| <i>CCL25</i>           | O15444                                  | 1.07536        | 0.290446       |
| <i>HGF</i>             | P14210                                  | 1.0654         | 0.287859       |
| <i>CXCL11</i>          | O14625                                  | 1.05043        | 0.283842       |
| <b>ADA<sup>#</sup></b> | P00813                                  | 1.0382         | -0.28034       |
| <i>SCF</i>             | P21583                                  | 1.0343         | -0.27939       |
| <i>IL-6</i>            | P05231                                  | 1.01946        | 0.275388       |
| <i>IL-15RA</i>         | Q13261                                  | 1.00705        | 0.271993       |
